# Supplementary material for: Genotyping by Sequencing Highlights a Polygenic Resistance to Ralstonia pseudosolanacearum in Eggplant (Solanum melongena L.)
Source: MDPI journal article supplement (doi:10.3390/ijms19020357), 2018-01-25
Supplement: s1 [file s1]

**Table S1.** List of DNA samples used for genotyping by sequencing (GBS). Their associated barcode sequences and the number of reads after demultiplexing and cleaning steps are indicated.

| Individuals | Type  | Sequencing lane | Barcodes                            | Number of reads | Comments  |
|-------------|-------|-----------------|-------------------------------------|-----------------|-----------|
| MM738       | E8    | 1               | TTGTT/TTGACGT                       | 3,462,252       |           |
| EG203       | E4    | 1               | TTCAGA/TTGCAGGA                     | 6,632,870       |           |
| S001        | DH    | 1               | AACT/GGCTGA                         | 8,497,078       |           |
| S002        | DH    | 1               | CCTA/CAAGTT                         | 4,203,095       |           |
| S003        | DH    | 1               | TTAC/TGTTCA                         | 6,003,998       |           |
| S004        | DH    | 1               | AGGC/TTGCAGA                        | 6,826,164       |           |
| S005        | DH    | 1               | GCAT/AACAGGT                        | 5,038,625       |           |
| S006        | DH    | 1               | TAGA/CCACTGA                        | 7,136,508       |           |
| S007        | DH    | 1               | GTCA/CTTGAGT                        | 7,694,123       |           |
| S008        | DH    | 1               | GATC/TGCTGGA                        | 5,614,369       |           |
| S010        | DH    | 1               | CTGT/GAGCAGT                        | 5,986,442       |           |
| S011        | DH    | 1               | AGAGA/ACAACGT                       | 2,005,225       |           |
| S012        | DH    | 1               | CGCGT/CTGGTGA                       | 1,778,691       |           |
| S013        | DH    | 1               | TCTGA/GCTTGGA                       | 3,909,145       |           |
| S014        | DH    | 1               | AACAT/TGACAGT                       | 3,120,711       |           |
| S015        | DH    | 1               | CCACA/AACGTGA                       | 3,351,868       |           |
| S016        | DH    | 1               | GATGT/CATTGGT                       | 2,687,729       |           |
| S017        | DH    | 1               | CGTAA/GGCCTGA                       | 5,029,519       |           |
| S018        | DH    | 1               | ACATT/ACTAAGA                       | 4,419,904       |           |
| S019        | DH    | 1               | TTCCA/TTAGCTT                       | 8,540,098       |           |
| S020        | DH    | 1               | GTGGA/CGGTGAA                       | 4,673,236       |           |
| S021        | DH    | 1               | AGTCT/GAATCGT                       | 3,395,762       |           |
| S022        | DH    | 1               | CACTA/ACCAGTA                       | 7,270,665       |           |
| S023        | DH    | 1               | TGAAT/TTGCTAT                       | 5,312,278       |           |
| S024        | DH    | 1               | GCGAT/GGTGAGC                       | 4,810,672       |           |
| S025        | DH    | 1               | AAGCA/AACAATGA                      | 6,288,181       |           |
| S026        | DH    | 1               | CTAGC/CCACCGGT                      | 2,632,355       |           |
| S027        | DH    | 1               | TCCTC/CTTGTAGT                      | 3,439,552       |           |
| S028        | DH    | 1               | GTACT/TCGTGGA                       | 3,232,965       |           |
| S029        | DH    | 1               | GGTTC/GGAACGGT                      | 4,262,172       |           |
| S030        | DH    | 1               | ACGGC/AATCAAGA                      | 3,773,710       | discarded |
| S031        | DH    | 1               | CACAGT/TTCGTTGA                     | 5,536,563       |           |
| S032        | DH    | 1               | TCTGGA/CGGTGAGT                     | 5,797,771       |           |
| S033        | DH    | 1               | AGACGT/GAATCGGA                     | 5,574,131       |           |
| S034        | DH    | 1               | CATTGA/ACCATTGT                     | 3,347,110       |           |
| S035        | DH    | 1               | GCAGGT/GCTGGAGT                     | 4,716,677       |           |
| S036        | DH    | 1               | TGGCGA/AGACCTTA                     | 5,118,805       |           |
| S037        | DH    | 1               | ATCGGT/CACAAGAT                     | 3,388,453       |           |
| S038        | DH    | 1               | CAGTAT/TGTTGCGA                     | 3,911,296       |           |
| S039        | DH    | 1               | CGTATA/CTGGTTAT                     | 3,031,826       |           |
| S041        | DH    | 1               | GAGCGT/GAACAATA                     | 3,017,599       |           |
| S042        | DH    | 1               | ACATGA/ACCACGCT                     | 3,637,223       |           |
| S043        | DH    | 1               | TGCAAT/GTTGTCGA                     | 8,570,216       |           |
| S044        | DH    | 1               | CTTGAA/TCGTGATT                     | 4,245,058       |           |
| S045        | DH    | 1               | GACATA/AGACTTAT                     | 4,464,119       |           |
| S046        | DH    | 1               | ACTAGT/CACTCCGA                     | 6,748,737       |           |
| blank       | water | 1               | GTACAA/ACGGTT/TTGAAGCT/GGTG<br>GCAA | 2,344           |           |

**Table S1.** Continued

| Individuals | Type  | Sequencing lane | Barcodes                   | Number of reads | Comments  |
|-------------|-------|-----------------|----------------------------|-----------------|-----------|
| MM738       | E8    | 2               | GCAGGT/GCTGGAGT            | 10,532,051      |           |
| EG203       | E4    | 2               | CGCGT/CTGGTGA              | 7,793,210       |           |
| S047        | DH    | 2               | AACT/GGCTGA                | 13,789,177      |           |
| S048        | DH    | 2               | CCTA/CAAGTT                | 13,834,948      |           |
| S049        | DH    | 2               | TTAC/TGTTCA                | 11,133,247      |           |
| S050        | DH    | 2               | AGGC/TTGCAGA               | 9,924,802       |           |
| S051        | DH    | 2               | GCAT/AACAGGT               | 11,456,666      |           |
| S052        | DH    | 2               | TAGA/CCACTGA               | 10,694,160      | discarded |
| S053        | DH    | 2               | GTCA/CTTGAGT               | 17,547,472      | discarded |
| S054        | DH    | 2               | GATC/TGCTGGA               | 10,387,132      |           |
| S055        | DH    | 2               | CTGT/GAGCAGT               | 9,846,556       |           |
| S056        | DH    | 2               | AGAGA/ACAACGT              | 8,501,194       |           |
| S057        | DH    | 2               | TCTGA/GCTTGGA              | 10,032,536      |           |
| S058        | DH    | 2               | AACAT/TGACAGT              | 7,823,310       |           |
| S059        | DH    | 2               | CCACA/AACGTGA              | 9,845,834       |           |
| S060        | DH    | 2               | TTGTT/TTGACGT              | 12,652,931      |           |
| S061        | DH    | 2               | GATGT/CATTGGT              | 10,721,515      |           |
| S062        | DH    | 2               | CGTAA/GGCTGA               | 13,784,824      |           |
| S063        | DH    | 2               | ACATT/ACTAAGA              | 15,498,404      |           |
| S064        | DH    | 2               | TTCCA/TTAGCTT              | 19,421,485      |           |
| S065        | DH    | 2               | GTGGA/CGGTGAA              | 15,415,339      |           |
| S066        | DH    | 2               | AGTCT/GAATCGT              | 12,782,101      |           |
| S067        | DH    | 2               | CACTA/ACCAGTA              | 19,502,579      |           |
| S068        | DH    | 2               | TGAAT/TTGCTAT              | 15,809,648      |           |
| S069        | DH    | 2               | GCGAT/GGTGAGC              | 14,272,550      |           |
| S070        | DH    | 2               | AAGCA/AACAATGA             | 13,409,675      |           |
| S071        | DH    | 2               | CTAGC/CCACCGGT             | 6,346,932       |           |
| S072        | DH    | 2               | TCCTC/CTTGTAGT             | 11,771,704      |           |
| S073        | DH    | 2               | GTACT/TCGTGTGA             | 10,207,550      |           |
| S074        | DH    | 2               | GGTTC/GGAACGGT             | 13,080,967      |           |
| S075        | DH    | 2               | ACGGC/AATCAAGA             | 18,410,703      |           |
| S076        | DH    | 2               | CACAGT/TTCGTTGA            | 12,020,621      |           |
| S077        | DH    | 2               | TCTGGA/CGGTGAGT            | 19,137,029      |           |
| S078        | DH    | 2               | AGACGT/GAATCGGA            | 17,542,719      |           |
| S079        | DH    | 2               | CATTGA/ACCATTGT            | 17,961,161      |           |
| S080        | DH    | 2               | TTCAGA/TTGCAGGA            | 18,069,543      |           |
| S081        | DH    | 2               | TGGCGA/AGACCTTA            | 16,883,692      |           |
| S083        | DH    | 2               | ATCGGT/CACAAGAT            | 14,448,301      |           |
| S084        | DH    | 2               | CAGTAT/TGTTGCGA            | 15,793,865      |           |
| S085        | DH    | 2               | CGTATA/CTGGTTAT            | 13,429,486      |           |
| S086        | DH    | 2               | GAGCGT/GTTGTCGA            | 17,187,924      |           |
| S087        | DH    | 2               | ACATGA/TCGTGATT            | 11,366,228      |           |
| S088        | DH    | 2               | TGCAAT/AGACTTAT            | 11,032,107      |           |
| S089        | DH    | 2               | CTTGAA/CACTCCGA            | 15,615,216      |           |
| S090        | DH    | 2               | GACATA/TTGAAGCT            | 17,983,771      | discarded |
| S091        | DH    | 2               | ACTAGT/GGTGGCAA            | 15,994,180      |           |
| Blank       | water | 2               | GTACAA/ACGGTT/GAACAAATA/AC | 12,238          |           |

**Table S1. Continued**

| Individuals | Type  | Sequencing lane | Barcodes                            | Number of reads | Comments  |
|-------------|-------|-----------------|-------------------------------------|-----------------|-----------|
| MM738       | E8    | 3               | GTACT/TCGTGTGA                      | 6,034,126       |           |
| EG203       | E4    | 3               | TTCCA/TTAGCTT                       | 8,568,806       |           |
| S093        | DH    | 3               | AACT/GGCTGA                         | 18,965,064      |           |
| S094        | DH    | 3               | CCTA/CAAGTT                         | 12,585,405      |           |
| S095        | DH    | 3               | TTAC/TGTTCA                         | 14,228,325      |           |
| S096        | DH    | 3               | AGGC/TTGCAGA                        | 14,226,544      |           |
| S097        | DH    | 3               | GCAT/AACAGGT                        | 12,919,922      |           |
| S098        | DH    | 3               | TAGA/CCACTGA                        | 11,952,642      |           |
| S099        | DH    | 3               | GTCA/CTTGAGT                        | 10,399,336      | discarded |
| S100        | DH    | 3               | GATC/TGCTGGA                        | 13,575,317      |           |
| S101        | DH    | 3               | CTGT/GAGCAGT                        | 8,560,256       |           |
| S102        | DH    | 3               | AGAGA/ACAACGT                       | 4,565,124       |           |
| S103        | DH    | 3               | CGCGT/CTGGTGA                       | 8,160,185       |           |
| S104        | DH    | 3               | TCTGA/GCTTGA                        | 9,527,121       |           |
| S105        | DH    | 3               | AACAT/TGACAGT                       | 8,177,073       |           |
| S106        | DH    | 3               | CCACA/AACGTGA                       | 9,272,738       | discarded |
| S107        | DH    | 3               | TTGTT/TTGACGT                       | 7,188,519       |           |
| S108        | DH    | 3               | GATGT/CATTGGT                       | 4,861,281       |           |
| S109        | DH    | 3               | CGTAA/GGCCTGA                       | 12,411,774      |           |
| S110        | DH    | 3               | ACATT/ACTAAGA                       | 11,997,503      |           |
| S112        | DH    | 3               | GTGGA/CGGTGAA                       | 13,438,920      |           |
| S113        | DH    | 3               | AGTCT/GAATCGT                       | 10,681,632      | discarded |
| S115        | DH    | 3               | CACTA/ACCAGTA                       | 11,856,418      | discarded |
| S116        | DH    | 3               | TGAAT/TTGCTAT                       | 10,864,011      | discarded |
| S117        | DH    | 3               | GCGAT/GGTGAGC                       | 9,592,038       |           |
| S118        | DH    | 3               | AAGCA/AACAATGA                      | 14,275,060      |           |
| S119        | DH    | 3               | CTAGC/CCACCGGT                      | 5,746,406       |           |
| S120        | DH    | 3               | TCCTC/CTTGTAGT                      | 7,946,874       |           |
| S121        | DH    | 3               | GGTTC/GGAACGGT                      | 10,724,441      |           |
| S122        | DH    | 3               | ACGGC/AATCAAGA                      | 10,198,397      |           |
| S123        | DH    | 3               | CACAGT/TTCGTTGA                     | 12,139,396      |           |
| S124        | DH    | 3               | TCTGGA/CGGTGAGT                     | 16,931,721      |           |
| S125        | DH    | 3               | AGACGT/GAATCGGA                     | 16,533,100      |           |
| S126        | DH    | 3               | CATTGA/ACCATTGT                     | 12,048,671      |           |
| S127        | DH    | 3               | TTCAGA/TTGCAGGA                     | 19,618,234      |           |
| S128        | DH    | 3               | GCAGGT/GCTGGAGT                     | 9,732,280       |           |
| S129        | DH    | 3               | TGGCGA/AGACCTTA                     | 12,414,933      |           |
| S132        | DH    | 3               | ATCGGT/CACAAGAT                     | 11,479,474      |           |
| S134        | DH    | 3               | CAGTAT/TGTTGCGA                     | 12,038,141      |           |
| S135        | DH    | 3               | CGTATA/CTGGTTAT                     | 6,796,486       |           |
| S137        | DH    | 3               | GAGCGT/ACCACGCT                     | 8,317,235       |           |
| S141        | DH    | 3               | ACATGA/GTTGTCCA                     | 16,591,861      |           |
| S143        | DH    | 3               | TGCAAT/TCGTGATT                     | 7,506,787       |           |
| S148        | DH    | 3               | CTTGAA/AGACTTAT                     | 7,841,993       |           |
| S166        | DH    | 3               | GACATA/CACTCCGA                     | 13,114,234      |           |
| S177        | DH    | 3               | ACTAGT/TTGAAGCT                     | 10,799,633      |           |
| Blank       | water | 3               | GTACAA/ACGGTT/GAACAATA/GGTGGC<br>AA | 8,657           |           |

**Table S2.** Descriptive statistics of the newly developed [EG203 × MM738] genetic map.

| Linkage group (LG) | Number of SNPs | Average interval <sup>a</sup> (cM) | Maximum interval <sup>b</sup> (cM) | Length (cM) | % Skewed markers <sup>c</sup> | Estimated genome length (cM) | Genome Coverage (%) |
|--------------------|----------------|------------------------------------|------------------------------------|-------------|-------------------------------|------------------------------|---------------------|
| E01                | 141            | 1.07                               | 8.14                               | 150.85      | 4.96                          | 153.01                       | 86.08               |
| E02                | 114            | 1.28                               | 9.75                               | 146.13      | 3.51                          | 148.72                       | 85.95               |
| E03                | 132            | 1.27                               | 9.10                               | 167.34      | 12.12                         | 169.89                       | 86.10               |
| E04                | 91             | 1.33                               | 8.32                               | 120.90      | 1.10                          | 123.59                       | 85.89               |
| E05                | 79             | 1.26                               | 7.53                               | 99.91       | 0.00                          | 102.47                       | 85.67               |
| E06                | 107            | 1.08                               | 6.60                               | 115.23      | 10.28                         | 117.40                       | 86.04               |
| E07                | 95             | 0.99                               | 5.30                               | 94.44       | 0.00                          | 96.45                        | 85.78               |
| E08                | 88             | 1.31                               | 11.32                              | 114.93      | 12.50                         | 117.57                       | 85.93               |
| E09                | 90             | 1.35                               | 34.90                              | 121.13      | 7.78                          | 123.85                       | 85.94               |
| E10                | 83             | 1.44                               | 9.13                               | 119.24      | 28.92                         | 122.15                       | 85.87               |
| E11                | 97             | 1.23                               | 10.27                              | 119.63      | 0.0                           | 122.12                       | 85.83               |
| E12                | 53             | 1.72                               | 15.11                              | 91.39       | 11.32                         | 94.91                        | 85.35               |
| Total              | 1170           | 1.25                               | 34.90                              | 1461.02     | 7.44                          | 1492.13                      | 85.92               |

<sup>a</sup> Mean number of markers per cM.

<sup>b</sup> Maximum interval without markers.

<sup>c</sup> Percentage of markers, which deviate from the 1:1 expected segregation ratio in a DH population at P-value < 0.05.

**Table S3.** Excel file with the complete genetic map of [EG203 × MM738] DH population and SNP sequences' significant hits on eggplant, tomato, pepper and potato.

**Table S4.** Pearson correlation coefficients among variables measured during two seasons and computed across seasons (Comb) in the DH population inoculated with strain R3598 (Cameroon assay).

| Season |                    | 1                  |                  |                  |                |      | 2                  |                  |                  |                |      | Comb               |                  |                  |                |      |
|--------|--------------------|--------------------|------------------|------------------|----------------|------|--------------------|------------------|------------------|----------------|------|--------------------|------------------|------------------|----------------|------|
|        | Var <sup>a</sup>   | SCO <sub>max</sub> | W <sub>max</sub> | SCO <sub>a</sub> | W <sub>a</sub> | CI   | SCO <sub>max</sub> | W <sub>max</sub> | SCO <sub>a</sub> | W <sub>a</sub> | CI   | SCO <sub>max</sub> | W <sub>max</sub> | SCO <sub>a</sub> | W <sub>a</sub> | CI   |
| 1      | SCO <sub>max</sub> | 1.00               |                  |                  |                |      |                    |                  |                  |                |      |                    |                  |                  |                |      |
|        | W <sub>max</sub>   | 0.99               | 1.00             |                  |                |      |                    |                  |                  |                |      |                    |                  |                  |                |      |
|        | SCO <sub>a</sub>   | 0.86               | 0.83             | 1.00             |                |      |                    |                  |                  |                |      |                    |                  |                  |                |      |
|        | W <sub>a</sub>     | 0.88               | 0.86             | 0.99             | 1.00           |      |                    |                  |                  |                |      |                    |                  |                  |                |      |
|        | CI                 | 0.61               | 0.62             | 0.57             | 0.59           | 1.00 |                    |                  |                  |                |      |                    |                  |                  |                |      |
| 2      | SCO <sub>max</sub> | 0.33               | 0.32             | 0.26             | 0.28           | 0.31 | 1.00               |                  |                  |                |      |                    |                  |                  |                |      |
|        | W <sub>max</sub>   | 0.35               | 0.34             | 0.28             | 0.31           | 0.33 | 0.93               | 1.00             |                  |                |      |                    |                  |                  |                |      |
|        | SCO <sub>a</sub>   | 0.26               | 0.24             | 0.22             | 0.22           | 0.27 | 0.97               | 0.82             | 1.00             |                |      |                    |                  |                  |                |      |
|        | W <sub>a</sub>     | 0.29               | 0.27             | 0.24             | 0.24           | 0.28 | 0.97               | 0.88             | 0.98             | 1.00           |      |                    |                  |                  |                |      |
|        | CI                 | 0.50               | 0.49             | 0.39             | 0.40           | 0.50 | 0.71               | 0.68             | 0.66             | 0.69           | 1.00 |                    |                  |                  |                |      |
| Comb   | SCO <sub>max</sub> | 0.91               | 0.89             | 0.78             | 0.80           | 0.61 | 0.69               | 0.67             | 0.62             | 0.65           | 0.69 | 1.00               |                  |                  |                |      |
|        | W <sub>max</sub>   | 0.82               | 0.83             | 0.69             | 0.72           | 0.58 | 0.75               | 0.81             | 0.64             | 0.69           | 0.72 | 0.96               | 1.00             |                  |                |      |
|        | SCO <sub>a</sub>   | 0.86               | 0.82             | 0.97             | 0.97           | 0.59 | 0.48               | 0.46             | 0.45             | 0.46           | 0.52 | 0.87               | 0.79             | 1.00             |                |      |
|        | W <sub>a</sub>     | 0.84               | 0.81             | 0.91             | 0.92           | 0.59 | 0.62               | 0.60             | 0.57             | 0.60           | 0.60 | 0.92               | 0.87             | 0.98             | 1.00           |      |
|        | CI                 | 0.65               | 0.65             | 0.57             | 0.58           | 0.89 | 0.57               | 0.56             | 0.51             | 0.53           | 0.84 | 0.75               | 0.74             | 0.64             | 0.69           | 1.00 |

<sup>a</sup> Variables measured: the maximal score (SCO<sub>max</sub>); the maximal wilting percentage (W<sub>max</sub>); the of area under disease progress curve for the score (SCO<sub>a</sub>); the wilting percentage (W<sub>a</sub>) and the colonization percentage (CI).

**Table S5.** Pearson correlation coefficients among variables measured during two seasons and computed across seasons (Comb) in the DH population inoculated with strain PSS4 (Reunion assay).

| Season |                               | 1                  |                  |                               |                             | 2    |                    |                  |                               | Comb                        |      |                    |                  |                               |                             |      |  |
|--------|-------------------------------|--------------------|------------------|-------------------------------|-----------------------------|------|--------------------|------------------|-------------------------------|-----------------------------|------|--------------------|------------------|-------------------------------|-----------------------------|------|--|
|        | Var <sup>a</sup>              | SCO <sub>max</sub> | W <sub>max</sub> | SCO <sub>a</sub> <sup>b</sup> | W <sub>a</sub> <sup>b</sup> | CI   | SCO <sub>max</sub> | W <sub>max</sub> | SCO <sub>a</sub> <sup>b</sup> | W <sub>a</sub> <sup>b</sup> | CI   | SCO <sub>max</sub> | W <sub>max</sub> | SCO <sub>a</sub> <sup>b</sup> | W <sub>a</sub> <sup>b</sup> | CI   |  |
| 1      | SCO <sub>max</sub>            | 1.00               |                  |                               |                             |      |                    |                  |                               |                             |      |                    |                  |                               |                             |      |  |
|        | W <sub>max</sub>              | 0.98               | 1.00             |                               |                             |      |                    |                  |                               |                             |      |                    |                  |                               |                             |      |  |
|        | SCO <sub>a</sub> <sup>b</sup> | 0.98               | 0.96             | 1.00                          |                             |      |                    |                  |                               |                             |      |                    |                  |                               |                             |      |  |
|        | W <sub>a</sub> <sup>b</sup>   | 0.98               | 0.97             | 0.99                          | 1.00                        |      |                    |                  |                               |                             |      |                    |                  |                               |                             |      |  |
|        | CI                            | 0.86               | 0.88             | 0.82                          | 0.84                        | 1.00 |                    |                  |                               |                             |      |                    |                  |                               |                             |      |  |
| 2      | SCO <sub>max</sub>            | 0.50               | 0.49             | 0.47                          | 0.47                        | 0.55 | 1.00               |                  |                               |                             |      |                    |                  |                               |                             |      |  |
|        | W <sub>max</sub>              | 0.50               | 0.49             | 0.47                          | 0.47                        | 0.54 | 0.99               | 1.00             |                               |                             |      |                    |                  |                               |                             |      |  |
|        | SCO <sub>a</sub> <sup>b</sup> | 0.49               | 0.48             | 0.47                          | 0.47                        | 0.54 | 0.95               | 0.91             | 1.00                          |                             |      |                    |                  |                               |                             |      |  |
|        | W <sub>a</sub> <sup>b</sup>   | 0.49               | 0.48             | 0.47                          | 0.48                        | 0.54 | 0.95               | 0.93             | 0.99                          | 1.00                        |      |                    |                  |                               |                             |      |  |
|        | CI                            | 0.47               | 0.47             | 0.43                          | 0.43                        | 0.50 | 0.79               | 0.81             | 0.71                          | 0.72                        | 1.00 |                    |                  |                               |                             |      |  |
| Comb   | SCO <sub>max</sub>            | 0.88               | 0.87             | 0.86                          | 0.86                        | 0.82 | 0.85               | 0.84             | 0.81                          | 0.82                        | 0.72 | 1.00               |                  |                               |                             |      |  |
|        | W <sub>max</sub>              | 0.88               | 0.88             | 0.85                          | 0.86                        | 0.83 | 0.83               | 0.84             | 0.78                          | 0.79                        | 0.73 | 0.99               | 1.00             |                               |                             |      |  |
|        | SCO <sub>a</sub> <sup>b</sup> | 0.85               | 0.84             | 0.86                          | 0.85                        | 0.79 | 0.83               | 0.81             | 0.86                          | 0.86                        | 0.67 | 0.97               | 0.95             | 1.00                          |                             |      |  |
|        | W <sub>a</sub> <sup>b</sup>   | 0.86               | 0.85             | 0.85                          | 0.86                        | 0.81 | 0.83               | 0.81             | 0.85                          | 0.86                        | 0.67 | 0.97               | 0.96             | 0.99                          | 1.00                        |      |  |
|        | CI                            | 0.79               | 0.80             | 0.74                          | 0.76                        | 0.89 | 0.76               | 0.76             | 0.71                          | 0.71                        | 0.83 | 0.90               | 0.91             | 0.85                          | 0.86                        | 1.00 |  |

<sup>a</sup> Variables measured: the maximal score (SCO<sub>max</sub>); the maximal wilting percentage (W<sub>max</sub>); the area under disease progress curve for the score (SCO<sub>a</sub>); the wilting percentage (W<sub>a</sub>) and the colonization percentage (CI).

<sup>b</sup> Best linear unbiased predictor (Blup) of the SCO<sub>a</sub> and W<sub>a</sub> variables were computed for trials with PSS4 strain.

**Table S6.** QTLs of resistance to PSS4 strain (Reunion assay), detected by Simple Interval Mapping and Haley-Knott regression model, assuming a normal distribution in the [EG203 x MM738] DH population. QTL analysis was carried out for individual seasons, as well as for combined seasons (Comb).

| Season | Var <sup>a</sup>   | Chr <sup>b</sup> | QTL <sup>c</sup>           | Pos <sup>d</sup>    | Nearest marker       | Interval <sup>e</sup> | LOD | R <sup>2f</sup> | Add effect <sup>g</sup> | Total R <sup>2h</sup> |      |
|--------|--------------------|------------------|----------------------------|---------------------|----------------------|-----------------------|-----|-----------------|-------------------------|-----------------------|------|
| 1      | SCO <sub>max</sub> | E03              | <i>ERPR3a</i>              | 16.0                | s296164              | 3.0-28.0              | 3.8 | 13.2            | -0.38***                | 13.2                  |      |
|        | W <sub>a</sub>     | E03              | <i>ERPR3a</i>              | 16.0                | s296164              | 0.0-167.3             | 3.0 | 9.3             | -3.36**                 |                       |      |
|        |                    | E04              | <i>ERPR4</i>               | 98.0                | s311121              | 93.0-110.0            | 3.6 | 11.7            | -3.97***                | 20.4                  |      |
|        |                    |                  | Epistasis                  | <i>ERPR3a:ERPR4</i> |                      |                       | 1.0 | 3.1             | 2.30*                   |                       |      |
|        | CI                 | ns               | ns                         | ns                  | ns                   | ns                    | ns  | ns              | ns                      | ns                    |      |
| 2      | SCO <sub>max</sub> | E06              | <i>ERPR6b</i>              | 40.2                | s431                 | 6.0-52.0              | 3.6 | 12.5            | -0.33***                | 12.5                  |      |
|        | W <sub>a</sub>     | E02              | <i>ERPR2b</i>              | 98.4                | s51429               | 84.0-114.0            | 3.4 | 11.9            | -3.56***                | 11.9                  |      |
|        | CI                 | E01              | <i>ERPR1</i>               | 38.8                | s231295              | 19.0-108.0            | 3.1 | 10.9            | -5.83***                | 10.9                  |      |
| Comb   | SCO <sub>max</sub> | E03              | <i>ERPR3a</i>              | 16.0                | s296164              | 3.7-167.3             | 4.4 | 11.5            | -0.24***                |                       |      |
|        |                    | E04              | <i>ERPR4</i>               | 103.8               | s298545              | 66.0-113.0            | 4.6 | 12.1            | -0.23***                |                       |      |
|        |                    | E06              | <i>ERPR6b</i>              | 42.0                | s11362               | 39.0-44.0             | 7.0 | 19.2            | -0.22***                |                       |      |
|        |                    |                  |                            | Epistasis           | <i>ERPR3a:ERPR4</i>  |                       |     | 1.4             | 3.6                     | -0.06*                | 35.7 |
|        |                    |                  |                            |                     | <i>ERPR3a:ERPR6b</i> |                       |     | 3.0             | 7.7                     | -0.18**               |      |
|        |                    |                  |                            | <i>ERPR4:ERPR6b</i> |                      |                       | 1.4 | 3.5             | 0.02*                   |                       |      |
|        |                    |                  | <i>ERPR3a:ERPR4:ERPR6b</i> |                     |                      | 1.4                   | 3.5 | -0.17*          |                         |                       |      |
|        | W <sub>a</sub>     | E02              | <i>ERPR2b</i>              | 95.0                | s116247              | 72.0-118.0            | 4.4 | 14.0            | -3.07***                |                       |      |
|        |                    | E04              | <i>ERPR4</i>               | 91.0                | s260898              | 85.0-113.0            | 3.5 | 10.9            | -2.85***                | 22.1                  |      |
|        |                    |                  | Epistasis                  | <i>ERPR2b:ERPR4</i> |                      |                       | 1.1 | 3.2             | -1.80*                  |                       |      |
|        | CI                 | E03              | <i>ERPR3b</i>              | 126.7               | s231411              | 4.0-167.3             | 3.7 | 12.8            | -6.16***                | 12.8                  |      |

<sup>a</sup> The variables used are maximal score (SCO<sub>max</sub>), BLUP of area under disease curve progress for wilting percentage (W<sub>a</sub>) and colonization percentage (CI).

<sup>b</sup> Linkage groups named according to their chromosome correspondence.

<sup>c</sup> Name of the QTL: Eggplant *Ralstonia pseudosolanacearum* Resistance (*ERPR*) followed by the chromosome number. When several QTLs are detected on the same chromosome, a letter is added to the QTL name for identification purposes.

<sup>d</sup> Position of the maximum logarithm of odds score (LOD) in centimorgans (cM).

<sup>e</sup> 95% Bayesian confidence interval (cM).

<sup>f</sup> Estimates of the percentage of phenotypic variance explained by the QTL detected.

<sup>g</sup> Additive effect: a positive value indicates that resistance comes from the E8 (MM738) allele, while a negative value indicates that resistance comes from the E4 (EG203) allele.

<sup>h</sup> Estimate of the total percentage of phenotypic variance explained by the additive model.

ns: QTLs were not detected above the LOD threshold.

**Table S7.** QTLs of resistance to R3598 strain (Cameroon assay), detected by simple interval mapping, and a non-parametric model for the [EG203 × MM738] DH population. QTL analysis was carried out for individual seasons, as well as for combined seasons (Comb).

| Season | Var <sup>a</sup>   | Chr <sup>b</sup> | QTL <sup>c</sup> | Pos <sup>d</sup> | Nearest marker | Interval <sup>e</sup> | LOD |
|--------|--------------------|------------------|------------------|------------------|----------------|-----------------------|-----|
| 1      | SCO <sub>max</sub> | E03              | <i>ERPR3a</i>    | 4.7              | s231544        | 0.0-28.0              | 3.1 |
|        | W <sub>a</sub>     | E03              | <i>ERPR3a</i>    | 4.7              | s231544        | 0.0-28.0              | 3.2 |
|        | CI                 | E03              | <i>ERPR3a</i>    | 5.0              | s197676        | 2.0-6.4               | 9.7 |
| 2      | SCO <sub>max</sub> | E09              | <i>ERPR9</i>     | 51.5             | s75856         | 40.0-80.7             | 2.9 |
|        | W <sub>a</sub>     | ns               | ns               | ns               | ns             | ns                    | ns  |
|        | CI                 | E09              | <i>ERPR9</i>     | 49.4             | s298980        | 42.0-67.0             | 3.2 |
| Comb   | SCO <sub>max</sub> | ns               | ns               | ns               | ns             | ns                    | ns  |
|        | W <sub>a</sub>     | ns               | ns               | ns               | ns             | ns                    | ns  |
|        | CI                 | E03              | <i>ERPR3a</i>    | 4.1              | s227496        | 0.0-6.4               | 7.7 |

<sup>a</sup> Variables used are the maximal score (SCO<sub>max</sub>), the area under disease curve progress for wilting percentage (W<sub>a</sub>) and the colonization percentage (CI).

<sup>b</sup> Linkage groups are named according to their chromosome correspondence.

<sup>c</sup> Name of the QTL: Eggplant *Ralstonia pseudosolanacearum* Resistance (*ERPR*) followed by the chromosome number. When several QTLs are detected on the same chromosome, they are identified by a different letter after the QTL name.

<sup>d</sup> Position of the maximum logarithm of odds score (LOD) in centimorgans (cM).

<sup>e</sup> 95 % Bayesian confidence interval (cM).

ns: QTLs were not detected above the LOD threshold.



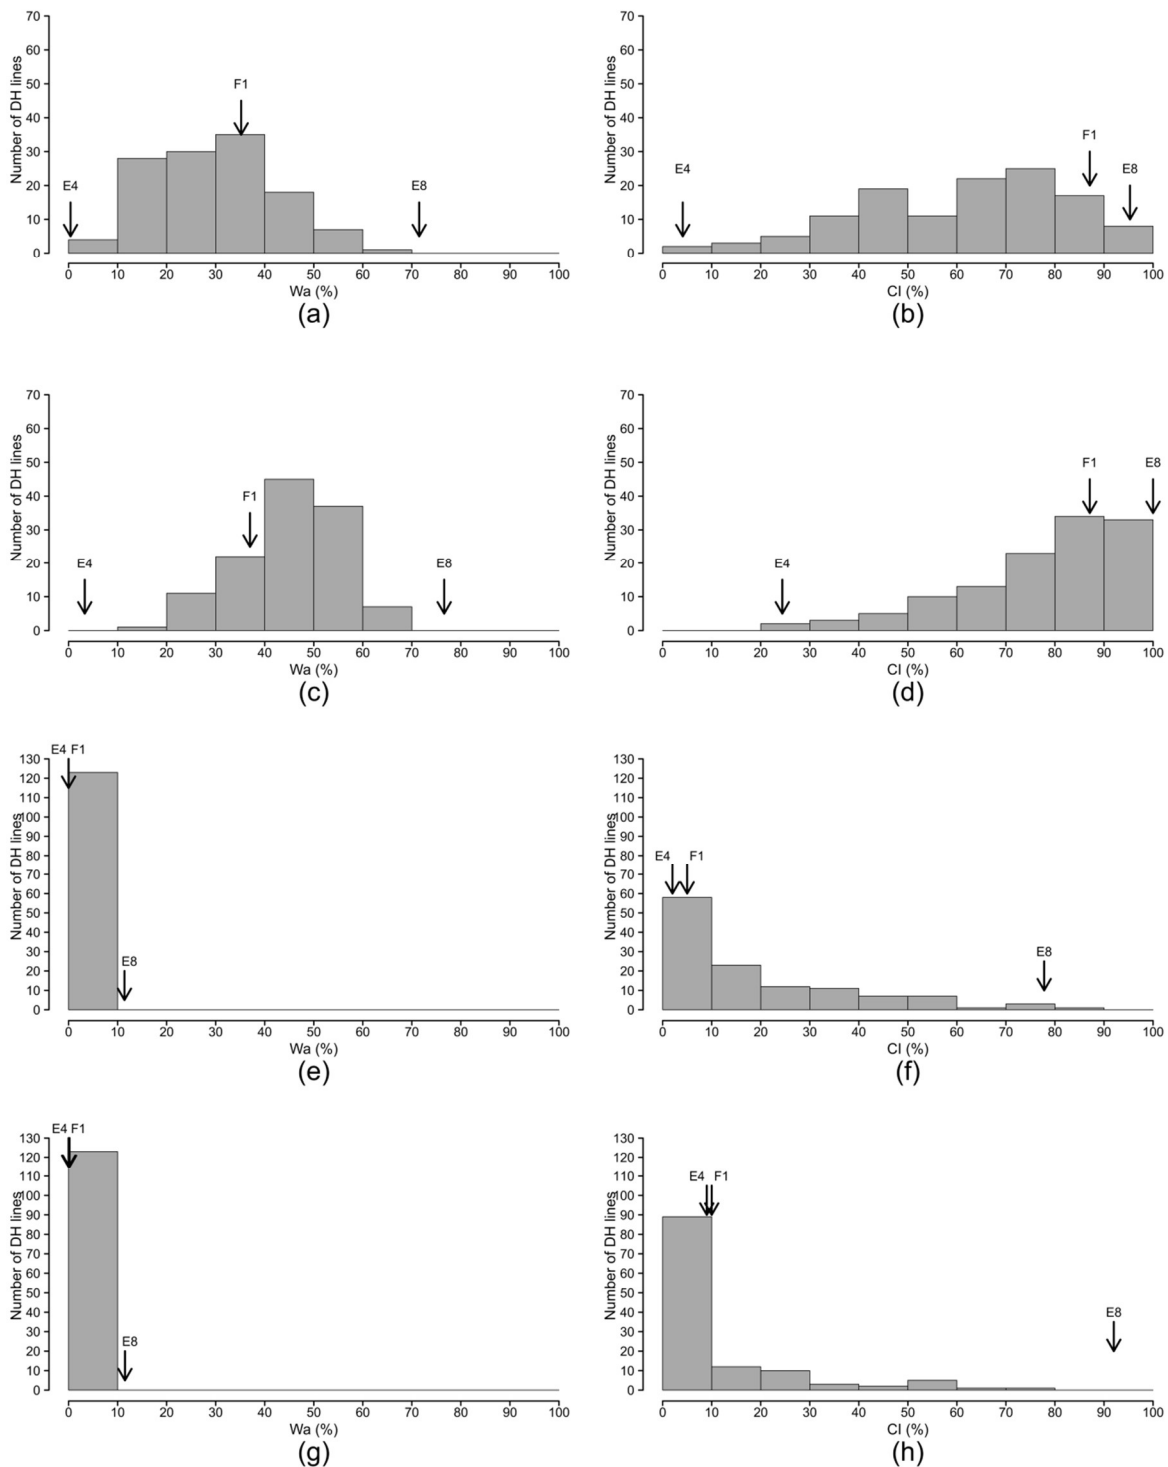

**Figure S1. Frequency distributions of BLUP  $W_a$  and CI for EG203 x MM738 DH population inoculated with strains PSS4 and R3598 in individual seasons.** Frequency distributions are presented for BLUP  $W_a$  (a) and CI (b) variables in season 1 and BLUP  $W_a$  (c) and CI (d) in season 2 for PSS4 strain (Reunion assay). For strain R3598 (Cameroon assay), frequency distributions are presented for  $W_a$  (e) and CI (f) variables in season 1, and  $W_a$  (g) and CI (h) in season 2. Arrows indicate the means of susceptible parent E8 (MM738), resistant parent E4 (EG203) and their F1 (E4x E8).

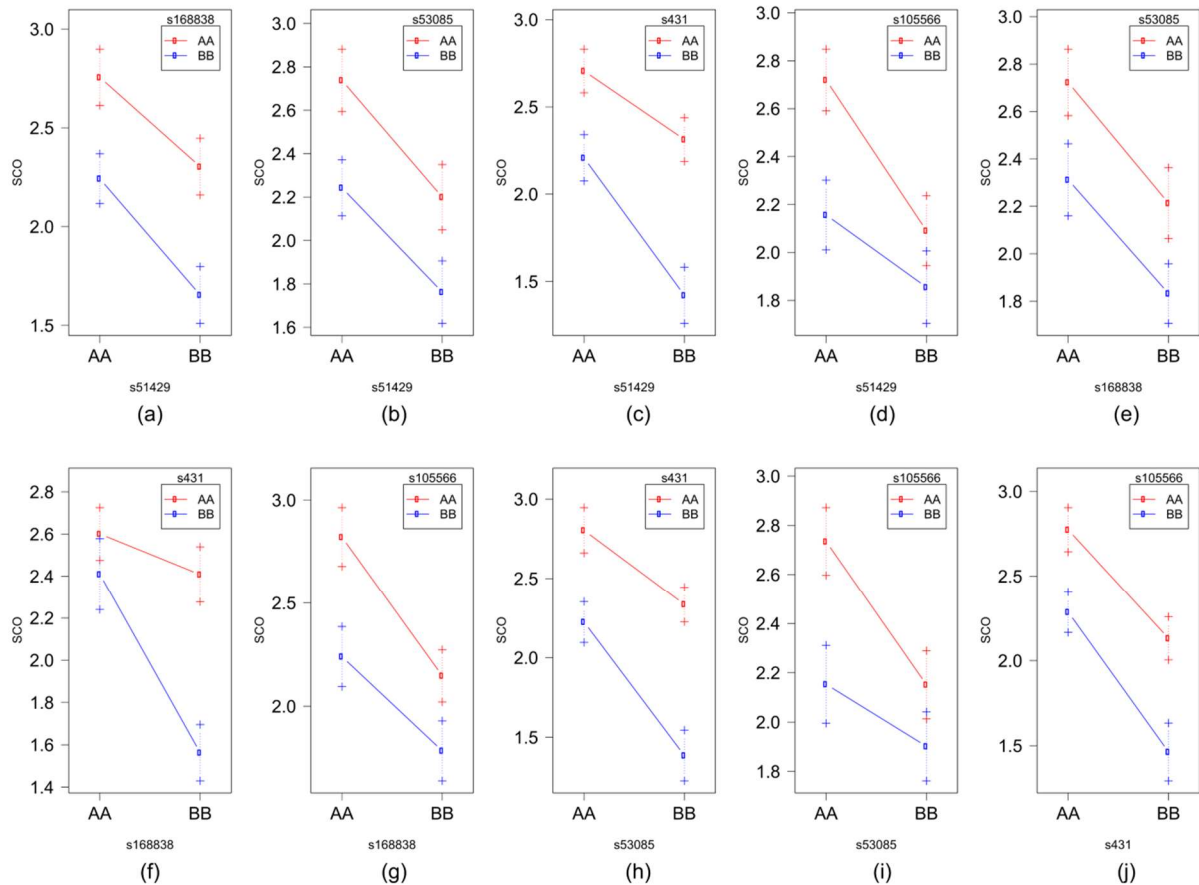

**Figure S2. Effectplots for epistatic interactions between pairs of QTL detected for  $SCO_{max}$  in combined seasons of PSS4 trials.**

Epistatic interactions are presented for closest markers at loci pairs: *ERPR2b/ERPR3a* (a); *ERPR2b/ERPR4* (b); *ERPR2b/ERPR6b* (c); *ERPR2b/ERPR8* (d); *ERPR3a/ERPR4* (e); *ERPR3a/ERPR6b* (f); *ERPR3a/ERPR8* (g); *ERPR4/ERPR6b* (h); *ERPR4/ERPR8* (i); *ERPR6b/ERPR8* (j).

AA: DH lines homozygous for E8 (MM738) alleles;

BB: DH lines homozygous for E4 (EG203) alleles.

Plotted points indicate  $SCO_{max}$  means  $\pm$  standard error for allelic combinations at locus 1 (X axis) and locus 2 (represented by a color code written in the rectangle at the top left corner of each sub-figure).
